# Supplementary material for: Marker-Assisted Improvement for Durable Bacterial Blight Resistance in Aromatic Rice Cultivar HUR 917 Popular in Eastern Parts of India
Source: MDPI journal article supplement (doi:10.3390/plants12061363), 2023-03-18
Supplement: s1 [file s1]

# **‘Marker-assisted improvement for durable bacterial blight resistance in aromatic rice cultivar HUR 917 popular in eastern parts of India’**

Manish Kumar<sup>1</sup>, Ravi Pratap Singh<sup>1</sup>, Debarchana Jena<sup>2</sup>, Vineeta Singh<sup>2</sup>, Diptibala Rout<sup>2</sup>, Panduranga B. Arsode<sup>1</sup>, Madhu Choudhary<sup>1</sup>, Prakash Singh<sup>3</sup>, Suman Chahar<sup>5</sup>, Sanghamitra Samantaray<sup>2</sup>, Arup Kumar Mukherjee<sup>2</sup>, Chander Mohan<sup>6</sup>, Abhishek Bohra<sup>7</sup>, Goutam Das<sup>2</sup>, Sumana Balo<sup>8</sup>, Onkar Nath Singh<sup>4</sup>, Ramlakhan Verma<sup>2\*</sup>

<sup>1</sup> Institute of Agricultural Science, Banaras Hindu University, Varanasi 221005, Uttar Pradesh

<sup>2</sup> ICAR-National Rice Research Institute, Cuttack 753006, Odisha, India

<sup>3</sup> Veer Kunwar Singh College of Agriculture, Bihar Agricultural University-BAU, Sabaur, Dumraon, Buxar 802136, Bihar, India

<sup>4</sup> Central State Farm, National Seeds Corporation, Sirsa Road, Hisar 125001, Haryana, India

<sup>5</sup> Department of Agriculture, Cooperation and Farmers Welfare, Government of India, New Delhi 110001, India

<sup>6</sup> State Agricultural Biotechnology Centre (SABC) and Centre for Crop and Food Innovation (CCFI), Murdoch University, Perth, WA 6150, Australia

<sup>7</sup> Department of Soil Science and Agricultural Chemistry, Uttar Banga Krishi Vishwavidyalaya, Coochbehar 736165, West Bengal, India

<sup>8</sup> Birsa Agricultural University (BAU), Ranchi 834006, Jharkhand, India

\* Correspondence: prakash201288@gmail.com (P.S.); ramlakhan.verma@icar.gov.in (R.V.); Tel: +91-8895237769 (P.S.); 91-8847841041 (R.V.)

**Supplementary Table S1. Similarity matrix of parental lines taken for genetic diversity analysis**

| Genotypes       | HUR 917 | IRBB 66 | IR64 MAS | CRMS 31B MAS | PR 114 IMP | Lalat MAS |
|-----------------|---------|---------|----------|--------------|------------|-----------|
| IRBB 66         | 0.77    |         |          |              |            |           |
| IR64 MAS        | 0.76    | 0.06    |          |              |            |           |
| CRMS 31B MAS    | 0.50    | 0.71    | 0.65     |              |            |           |
| PR 114 improved | 0.17    | 0.33    | 0.33     | 0.50         |            |           |
| Lalat MAS       | 0.17    | 0.50    | 0.50     | 0.67         | 0.67       |           |

**Supplementary Table S2. A list of polymorphic SSR markers between parents HUR 917 and IRBB66**

| Chromosome | Number of total SSRs | Number of polymorphic SSRs | Percent polymorphism | Name of the polymorphic SSR on respective chromosome                                           |
|------------|----------------------|----------------------------|----------------------|------------------------------------------------------------------------------------------------|
| 1          | 30                   | 8                          | 26.7                 | RM11258, RM11846, RM220, RM5443, RM11111, RM11438, RM472, RM1282,                              |
| 2          | 30                   | 6                          | 20.0                 | RM12469, RM12983, RM13562, RM13345, RM13781, RM13996                                           |
| 3          | 30                   | 7                          | 23.3                 | RM15855, RM14320, RM14473, RM14602, RM14946, RM15441, RM15981                                  |
| 4          | 30                   | 6                          | 20.0                 | RM17263, RM17349, RM16396, RM16706, RM16820, RM6303                                            |
| 5          | 30                   | 11                         | 36.7                 | RM18530, RM19101, RM17941, RM18065, RM18270, RM18360, RM122, RM16396, RM16706, RM16820, RM3476 |
| 6          | 30                   | 6                          | 20.0                 | RM20724, RM20773, RM19303, RM19422, RM20096, RM420                                             |
| 7          | 30                   | 6                          | 20.0                 | RM21024, RM20913, RM20961, RM21086, RM21539, RM21879                                           |
| 8          | 30                   | 7                          | 23.3                 | RM22914, RM22321, RM22521, RM22941, RM22984, RM23356, xa13prom                                 |
| 9          | 30                   | 5                          | 16.7                 | RM23937, RM24240, RM24414, RM24448, RM215                                                      |
| 10         | 30                   | 6                          | 20.0                 | RM25679, RM24999, RM25460, RM25735, RM228, RM25866                                             |
| 11         | 30                   | 6                          | 20.0                 | RM26118, RM26302, RM26393, RM26524, RM26969, pTA248                                            |
| 12         | 30                   | 8                          | 26.7                 | RM28767, RM27451, RM27840, RM28130, RM28270, RM27789, RM519, RM28766                           |
| Total      | 360                  | 82                         | 22.8%                |                                                                                                |

**Supplementary Table S3. Brief summary of selection differential and bacterial blight disease index in BC and advanced segregating generations**

| Generation                      | Selection differential ( $\Delta d$ ) for product profile trait |              |                        |                                  |            | PDI value                              | AUDPC          | Selection criteria                        |
|---------------------------------|-----------------------------------------------------------------|--------------|------------------------|----------------------------------|------------|----------------------------------------|----------------|-------------------------------------------|
|                                 | Name of trait                                                   | HUR-917 (RP) | Range before selection | Range in selected top ten plants | $\Delta d$ |                                        |                |                                           |
| F <sub>1s</sub>                 | -                                                               | -            | -                      | -                                | -          | -                                      | -              | Hybridity testing with R specific markers |
| BC <sub>1</sub> F <sub>1s</sub> | DFF (day)                                                       | 105          | 88.0-114.0             | 100.0-108.0                      | 1.56       | 11.82 $\pm$ 0.460 to 35.14 $\pm$ 0.344 | 204.43-599.27  | FS, BS, Phenome and bioassay              |
|                                 | PH (cm)                                                         | 111.2        | 93.45-111.75           | 102.0- 114.6                     | 2.12       |                                        |                |                                           |
|                                 | L/B ratio                                                       | 2.962        | 2.16-3.812             | 2.752- 3.242                     | 0.08       |                                        |                |                                           |
|                                 | HRR (%)                                                         | 69.4         | 53.45- 75.62           | 55.6-68.6                        | 0.51       |                                        |                |                                           |
|                                 | Aroma                                                           | 2            | 0-2                    | 2                                | 0          |                                        |                |                                           |
| BC <sub>2</sub> F <sub>1s</sub> | DFF (day)                                                       | 107          | 98.0-111.0             | 99.0- 108.0                      | 1.25       | 5.19 $\pm$ 0.114 to 13.48 $\pm$ 0.752  | 93.08-191.16   | FS, BS, Phenome and bioassay              |
|                                 | PH (cm)                                                         | 108.5        | 90.25-108.6            | 104.25-113.82                    | 2.85       |                                        |                |                                           |
|                                 | L/B ratio                                                       | 2.944        | 2.44-3.75              | 2.812 - 3.324                    | 0.22       |                                        |                |                                           |
|                                 | HRR (%)                                                         | 63.25        | 54.25-77.28            | 59.62- 80.35                     | 0.38       |                                        |                |                                           |
|                                 | Aroma                                                           | 2            | 0-2                    | 2                                | 0          |                                        |                |                                           |
| BC <sub>2</sub> F <sub>2s</sub> | DFF (day)                                                       | 106          | 89.0-113.0             | 96.0-110.0                       | 2.12       | 2.48 $\pm$ 0.624 to 18.24 $\pm$ 0.225  | 72.24-178.25   | FS, BS, Phenome and bioassay analysis     |
|                                 | PH (cm)                                                         | 113.4        | 85.25- 111.82          | 108.25-116.62                    | 1.68       |                                        |                |                                           |
|                                 | L/B ratio                                                       | 2.895        | 2.082- 3.816           | 2.783- 3.124                     | 0.15       |                                        |                |                                           |
|                                 | HRR (%)                                                         | 67.6         | 48.62-76.44            | 56.6 -75.8                       | 1.53       |                                        |                |                                           |
|                                 | Aroma                                                           | 2            | 0-2                    | 2                                | 0          |                                        |                |                                           |
| BC <sub>2</sub> F <sub>3s</sub> | DFF (day)                                                       | 103          | 102.0- 111.0           | 104.0 -114.0                     | 0.92       | 2.770.87 $\pm$ to 8.89 $\pm$ 1.12      | 79.30 - 101.63 | Phenomics analysis                        |
|                                 | PH (cm)                                                         | 110.6        | 99.52 -110.46          | 108.0- 115.25                    | 1.12       |                                        |                |                                           |
|                                 | L/B ratio                                                       | 2.91         | 2.65- 3.780            | 2.815-3.064                      | 0.062      |                                        |                |                                           |
|                                 | HRR (%)                                                         | 65.3         | 48.0- 78.64            | 58.2-78.95                       | 0.79       |                                        |                |                                           |
|                                 | Aroma                                                           | 2            | 2                      | 2                                | 0          |                                        |                |                                           |
| BC <sub>2</sub> F <sub>4s</sub> | DFF (day)                                                       | 106          | 103.0- 114.0           | 104.0 – 112.0                    | 0.62       | 2.68 $\pm$ 0.431 to 9.31 $\pm$ 0.280   | 77.25 -105.8   | BS, Phenome and bioassay analysis         |
|                                 | PH (cm)                                                         | 110.2        | 100.0- 114.6           | 101.71-112.2                     | 1.19       |                                        |                |                                           |
|                                 | L/B ratio                                                       | 2.965        | 2.752- 3.818           | 2.838-3.734                      | 0.11       |                                        |                |                                           |
|                                 | HRR (%)                                                         | 68.5         | 52.75- 81.62           | 53.6-79.2                        | 0.72       |                                        |                |                                           |
|                                 | Aroma                                                           | 2            | 2                      | 2                                | 0          |                                        |                |                                           |

*Note: FS-foreground selection, BS-background selection, PDI-percent disease index, AUDPC-area under disease progress curve,  $\Delta d$ -selection differential*

**Supplementary Table S4. RP genome recovery in BC<sub>2</sub>F<sub>2</sub> generation**

| Near Isogenic line (NILs) | Target gene combination | Markers with RP alleles | Heterozygosity | Donor alleles | % RP genome |
|---------------------------|-------------------------|-------------------------|----------------|---------------|-------------|
| HR 23-5-37-83             | Xa 21+ xa13+ xa5        | 75                      | 4              | 3             | 93.90       |
| HR 23-5-37-109            | Xa21*+ xa13+ xa5        | 77                      | 3              | 2             | 95.73       |
| HR 23-5-37-121            | Xa 21+ xa13+ xa5        | 75                      | 4              | 3             | 93.90       |
| HR 23-5-37-201            | Xa 21+xa13+ xa5         | 77                      | 2              | 3             | 95.12       |
| HR 23-5-37-282            | Xa21+ Xa13*+xa5         | 76                      | 3              | 3             | 94.51       |
| HR 23-65-6-38             | xa21+ xa13+xa5          | 76                      | 3              | 3             | 94.51       |
| HR 23-65-6-142            | Xa 21+ xa13+ xa5        | 76                      | 2              | 4             | 93.90       |
| HR 23-65-6-191            | Xa 21+ xa13+ xa5        | 75                      | 3              | 4             | 93.29       |
| HR 23-65-6-237            | Xa21+ xa13+ xa5         | 75                      | 4              | 3             | 93.90       |
| HR 23-65-6-242            | Xa 21+xa13+ Xa5         | 75                      | 3              | 4             | 93.29       |
| HR 23-65-6-256            | Xa 21*+ Xa13*+ xa5      | 77                      | 3              | 2             | 95.73       |
| HR 23-65-6-258            | Xa21+xa13+xa5           | 77                      | 2              | 3             | 95.12       |
| HR 23-135-83-7            | Xa21+Xa13*+xa           | 76                      | 3              | 3             | 94.51       |
| HR 23-135-83-24           | Xa21+xa13+xa5           | 77                      | 2              | 3             | 95.12       |
| HR 23-135-83-95           | xa21+Xa13+xa5           | 77                      | 4              | 1             | 96.34       |
| AVERAGE                   |                         | 76.07                   | 3.00           | 2.93          | 94.59       |

\*denote heteroalleles/segregating alleles

**Supplementary Table S5. X<sup>2</sup> analysis for aroma and palatability in RP and improved lines (BC<sub>2</sub>F<sub>4</sub>) based on panel test**

| Sample set              | No. of panellist | No. of judgments for aroma and palatability test in rice |           |                      |
|-------------------------|------------------|----------------------------------------------------------|-----------|----------------------|
|                         |                  | Correct                                                  | Incorrect | X <sup>2</sup> value |
| RP + HR 23-5-37-83-5    | 40               | 18                                                       | 22        | 1.85                 |
| RP + HR 23-5-37-83-12   | 40               | 14                                                       | 26        | 2.38                 |
| RP + HR 23-5-37-121-3   | 40               | 14                                                       | 26        | 2.38                 |
| RP + HR 23-5-37-121-10  | 40               | 18                                                       | 22        | 1.85                 |
| RP + HR 23-5-37-121-14  | 40               | 17                                                       | 23        | 0.49                 |
| RP + HR 23-5-37-201-9   | 40               | 17                                                       | 23        | 0.49                 |
| RP + HR 23-65-6-142-3   | 40               | 15                                                       | 25        | 0.56                 |
| RP + HR 23-65-6-142-18  | 40               | 17                                                       | 23        | 0.49                 |
| RP + HR 23-65-6-191-13  | 40               | 18                                                       | 22        | 1.85                 |
| RP + HR 23-65-6-237-2   | 40               | 15                                                       | 25        | 0.56                 |
| RP + HR 23-65-6-237-27  | 40               | 15                                                       | 25        | 0.56                 |
| RP + HR 23-65-6-258-10  | 40               | 15                                                       | 25        | 0.56                 |
| RP + HR 23-65-6-258-21  | 40               | 17                                                       | 23        | 0.49                 |
| RP + HR 23-135-83-24-1  | 40               | 17                                                       | 23        | 0.49                 |
| RP + HR 23-135-83-24-22 | 40               | 16                                                       | 24        | 0.85                 |

Note: Null hypothesis is rejected as Chi-square value is not significant, RP line is not significantly differing from NILs for palatability.

Supplementary Table S6. Performance of parents and BC2F4 derivatives of HUR 917/ IRBB66 for 15 morpho-agronomical traits disease severity, AUDPC value and genome recovery

| Lines/ NIL no.    | DPI | DFPE | DFF | DM  | PH     | NEBT  | PL    | GPP   | SF    | GYPP  | GY<br>(kg/ha) | TW   | KL   | KB   | KL<br>BR | HRR  | AC%   | GC | Aroma | PDI with SD (%) |           |           | AUD<br>PC |
|-------------------|-----|------|-----|-----|--------|-------|-------|-------|-------|-------|---------------|------|------|------|----------|------|-------|----|-------|-----------------|-----------|-----------|-----------|
|                   |     |      |     |     |        |       |       |       |       |       |               |      |      |      |          |      |       |    |       | 14<br>DAI       | 21<br>DAI | 28<br>DAI |           |
| HUR917            | 83  | 100  | 106 | 135 | 112.20 | 9.50  | 24.82 | 195.6 | 87.59 | 6.80  | 2,264.4       | 14.2 | 5.04 | 1.70 | 2.965    | 68.5 | 23.80 | 28 | 2     | 30.6            | 49.92     | 58.78     | 873.35    |
| IRBB66            | 85  | 102  | 107 | 135 | 108.50 | 10.80 | 22.42 | 192.5 | 77.61 | 20.40 | 6799.32       | 20.6 | 6.11 | 1.82 | 3.357    | 72.5 | 19.60 | 55 | 0     | 3.03            | 3.38      | 3.65      | 74.13     |
| HR 23-5-37-83-5   | 86  | 103  | 108 | 136 | 106.05 | 9.25  | 20.62 | 188.5 | 84.32 | 19.20 | 6399.36       | 16.4 | 6.12 | 1.86 | 3.308    | 68.6 | 22.73 | 35 | 2     | 2.15            | 3.36      | 2.68      | 77.25     |
| HR 23-5-37-83-12  | 88  | 105  | 110 | 130 | 104.01 | 8.75  | 22.42 | 200.1 | 82.33 | 18.60 | 6199.38       | 18.6 | 6.31 | 1.69 | 3.734    | 58.6 | 20.18 | 39 | 2     | 5.12            | 7.91      | 9.31      | 105.88    |
| HR 23-5-37-121-3  | 85  | 100  | 106 | 132 | 102.14 | 8.65  | 24.00 | 210.6 | 86.33 | 20.20 | 6732.66       | 20.2 | 6.22 | 1.74 | 3.575    | 62.4 | 21.62 | 28 | 2     | 3.42            | 4.08      | 2.81      | 59.89     |
| HR 23-5-37-121-10 | 90  | 106  | 110 | 135 | 107.05 | 9.12  | 25.40 | 204.5 | 85.46 | 21.40 | 7132.62       | 14.2 | 5.32 | 1.71 | 3.111    | 65.8 | 22.87 | 36 | 2     | 2.89            | 4.69      | 2.98      | 64.16     |
| HR 23-5-37-121-14 | 87  | 104  | 108 | 125 | 101.71 | 10.00 | 22.82 | 201.6 | 88.89 | 16.20 | 5399.46       | 13.6 | 5.08 | 1.70 | 2.988    | 76.5 | 24.12 | 38 | 2     | 6.20            | 7.03      | 8.86      | 122.42    |
| HR 23-5-37-201-9  | 83  | 98   | 106 | 125 | 106.38 | 12.40 | 23.65 | 198.0 | 88.13 | 17.50 | 5832.75       | 18.5 | 5.80 | 1.68 | 3.452    | 67.0 | 20.09 | 33 | 2     | 4.28            | 4.86      | 6.42      | 98.52     |
| HR 23-65-6-142-3  | 91  | 108  | 112 | 135 | 104.41 | 10.20 | 24.08 | 190.6 | 89.13 | 18.00 | 5999.40       | 20.1 | 6.04 | 1.85 | 3.265    | 64.2 | 21.82 | 34 | 2     | 2.81            | 4.19      | 1.83      | 36.07     |
| HR 23-65-6-142-18 | 88  | 102  | 108 | 130 | 106.91 | 9.80  | 25.00 | 189.2 | 90.23 | 16.80 | 5599.44       | 20.0 | 6.42 | 1.78 | 3.607    | 59.2 | 20.47 | 51 | 2     | 2.89            | 3.87      | 4.65      | 53.48     |
| HR 23-65-6-191-13 | 90  | 105  | 110 | 140 | 103.03 | 9.08  | 22.68 | 192.7 | 88.13 | 16.50 | 5499.45       | 16.4 | 5.42 | 1.72 | 3.151    | 53.6 | 23.66 | 55 | 2     | 6.25            | 7.42      | 8.05      | 154.5     |
| HR 23-65-6-237-2  | 84  | 100  | 105 | 135 | 105.13 | 9.32  | 23.65 | 185.5 | 87.86 | 20.08 | 6692.66       | 18.2 | 5.68 | 1.74 | 3.264    | 78.4 | 23.47 | 31 | 2     | 2.32            | 3.28      | 3.01      | 65.12     |
| HR 23-65-6-237-27 | 82  | 98   | 104 | 125 | 106.02 | 10.26 | 22.42 | 185.2 | 90.50 | 19.60 | 6532.68       | 20.0 | 6.02 | 1.82 | 3.308    | 69.5 | 21.85 | 45 | 2     | 3.57            | 5.19      | 8.32      | 77.95     |
| HR 23-65-6-258-10 | 86  | 103  | 109 | 132 | 104.32 | 8.06  | 21.54 | 190.5 | 76.20 | 18.20 | 6066.06       | 16.4 | 5.08 | 1.79 | 2.838    | 73.1 | 22.78 | 36 | 2     | 6.27            | 7.13      | 8.19      | 100.52    |
| HR 23-65-6-258-21 | 86  | 100  | 106 | 130 | 103.62 | 8.90  | 20.60 | 195.6 | 88.40 | 17.60 | 5866.08       | 15.6 | 5.40 | 1.67 | 3.234    | 79.2 | 20.12 | 38 | 2     | 3.03            | 4.76      | 5.87      | 64.47     |

|                    |       |        |        |        |        |       |       |        |       |       |         |       |      |      |       |       |       |       |      |      |      |      |        |
|--------------------|-------|--------|--------|--------|--------|-------|-------|--------|-------|-------|---------|-------|------|------|-------|-------|-------|-------|------|------|------|------|--------|
| HR 23-135-83-24-1  | 90    | 104    | 110    | 135    | 102.52 | 10.80 | 25.08 | 202.4  | 82.50 | 16.00 | 5332.80 | 17.2  | 5.92 | 1.82 | 3.253 | 63.5  | 24.08 | 44    | 2    | 6.07 | 7.18 | 9.12 | 103.43 |
| HR 23-135-83-24-22 | 91    | 106    | 110    | 135    | 109.47 | 11.24 | 23.60 | 208.2  | 88.86 | 19.40 | 6466.02 | 20.3  | 6.49 | 1.78 | 3.646 | 60.2  | 22.67 | 59    | 2    | 4.23 | 7.25 | 9.12 | 97.48  |
| Mean               | 86.76 | 102.59 | 107.94 | 132.35 | 105.50 | 9.77  | 23.22 | 195.96 | 86.03 | 18.38 | 6126.05 | 17.68 | 5.79 | 1.76 | 3.30  | 67.11 | 22.11 | 40.29 | 1.88 | 5.60 | 7.97 | 9.04 | 131.10 |

Note: NIL-near isogenic lines, DPI-days to panicle initiation, DFPE-days to first panicle emergence, DFF-days to 50% flowering, DM-days to maturity, PH-plant height, NETPP-number of effective tillers per plant, PL-panicle length, NGP-number of grains per panicle, TW-test weight, GYPP-grain yield per plant, KL-kernel length, KB-kernel breadth, KLBR-kernel length/breadth ratio, HRR-head rice recovery, AC-amylose content, GC-gelatinization content and DS-disease severity; DAI-days after inoculation and AUDPC-area under disease progress curve; GR-genome recovery.

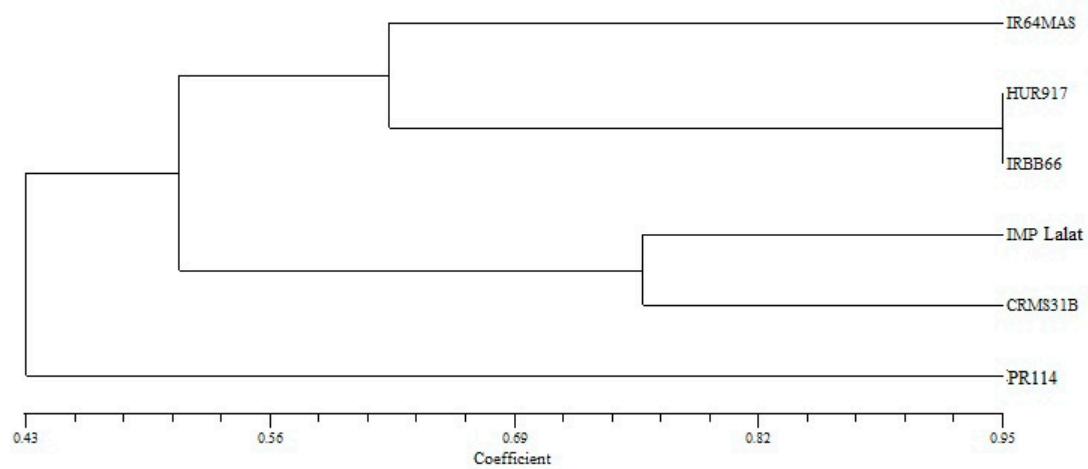

**Supplementary Figure S1.** Genetic relationship amongst the recurrent parent HUR 917 and donors

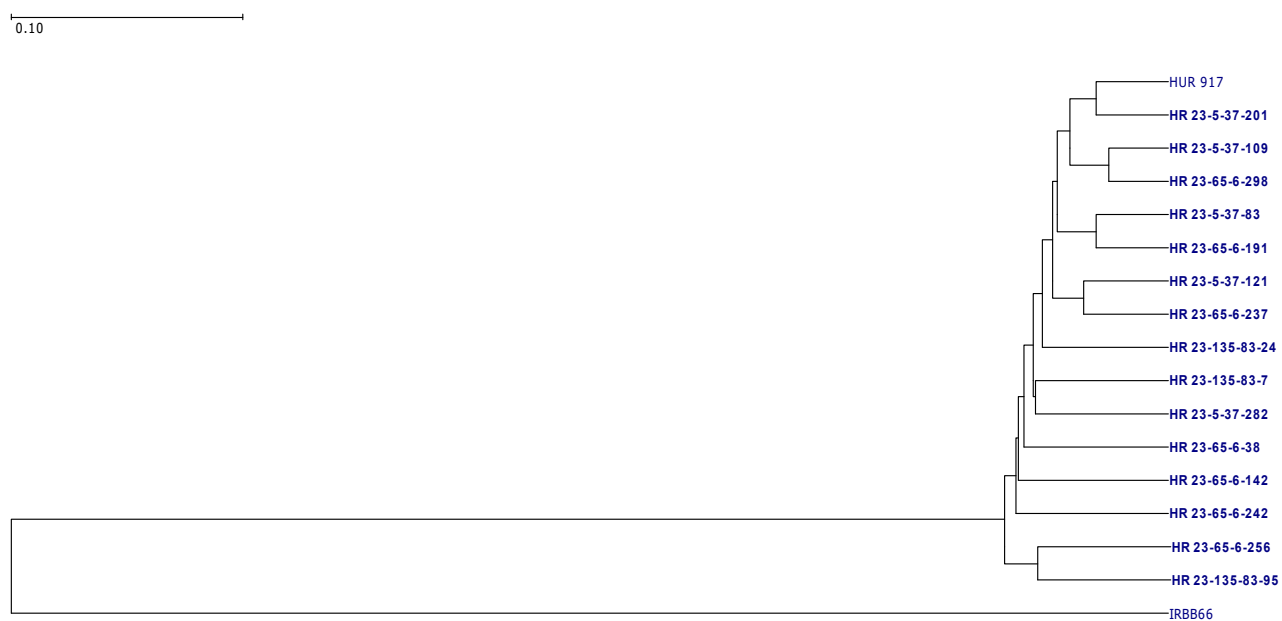

**Supplementary Figure S2.** Genetic relationship amongst the recurrent parent HUR 917 and NILs

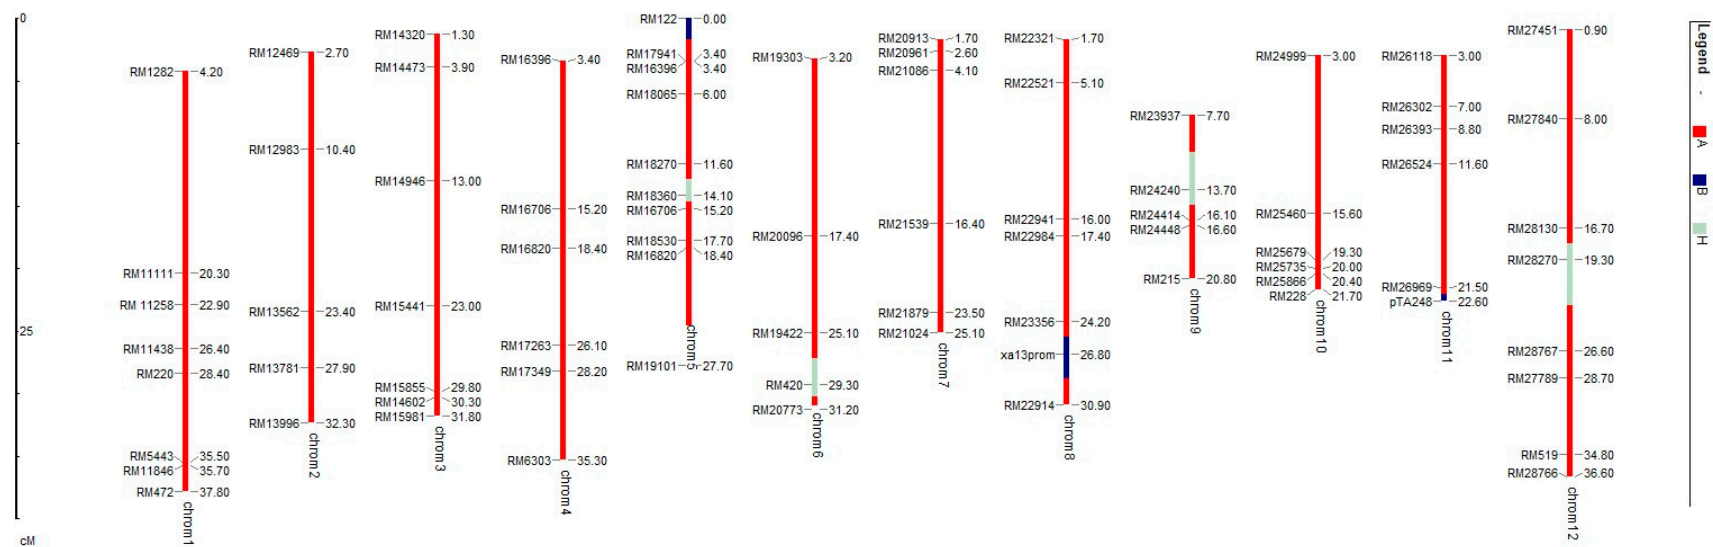

Supplementary Figure S3. Physical position of SSR markers used for gene introgression and genome recovery of the recurrent parent.



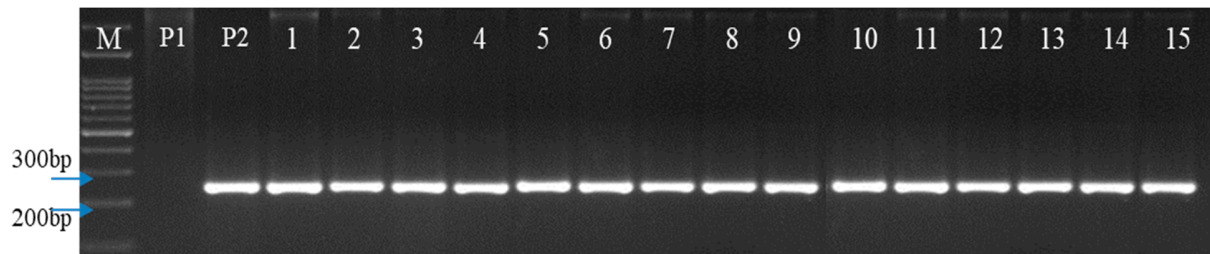

Supplementary Figure S4. PCR amplification of BADH2 gene in BC<sub>2</sub>F<sub>4</sub> NILs using FMbadh2-E7 functional marker; M, Marker; P1- IRBB66, P2-RP (HUR 917) and lane 3-18 are NILs.

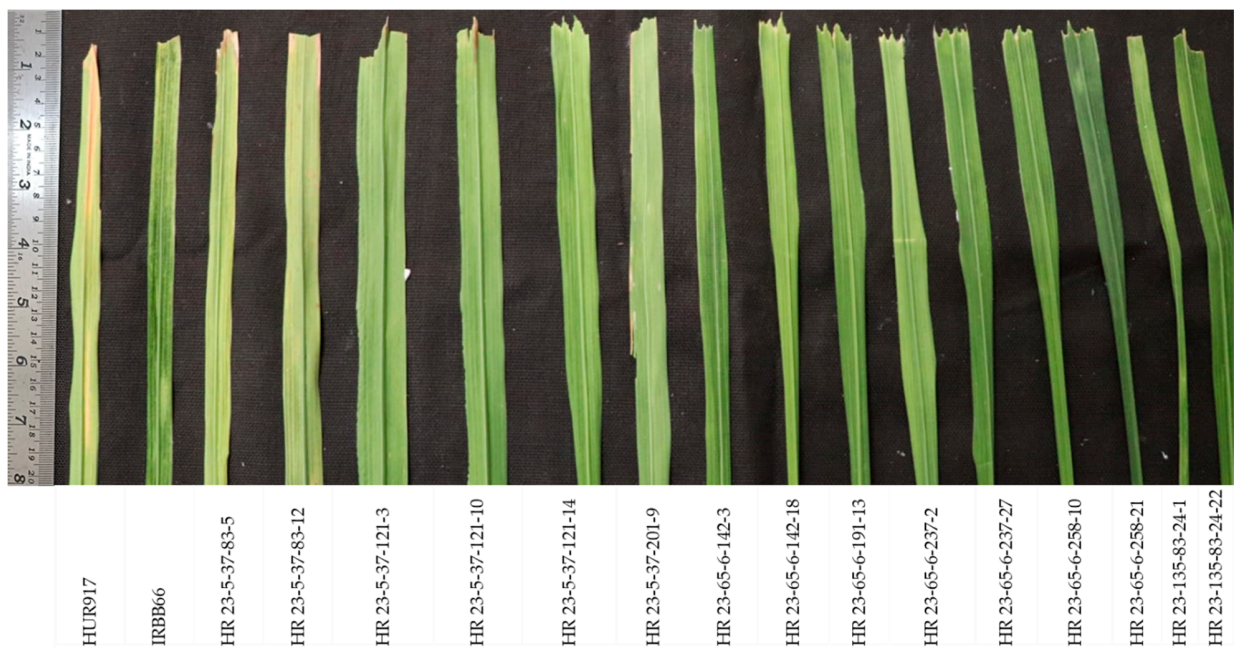

Supplementary Figure S5. Bacterial blight disease severity in parents and NILs after 21 days of inoculation of eight virulent *Xoo* races.



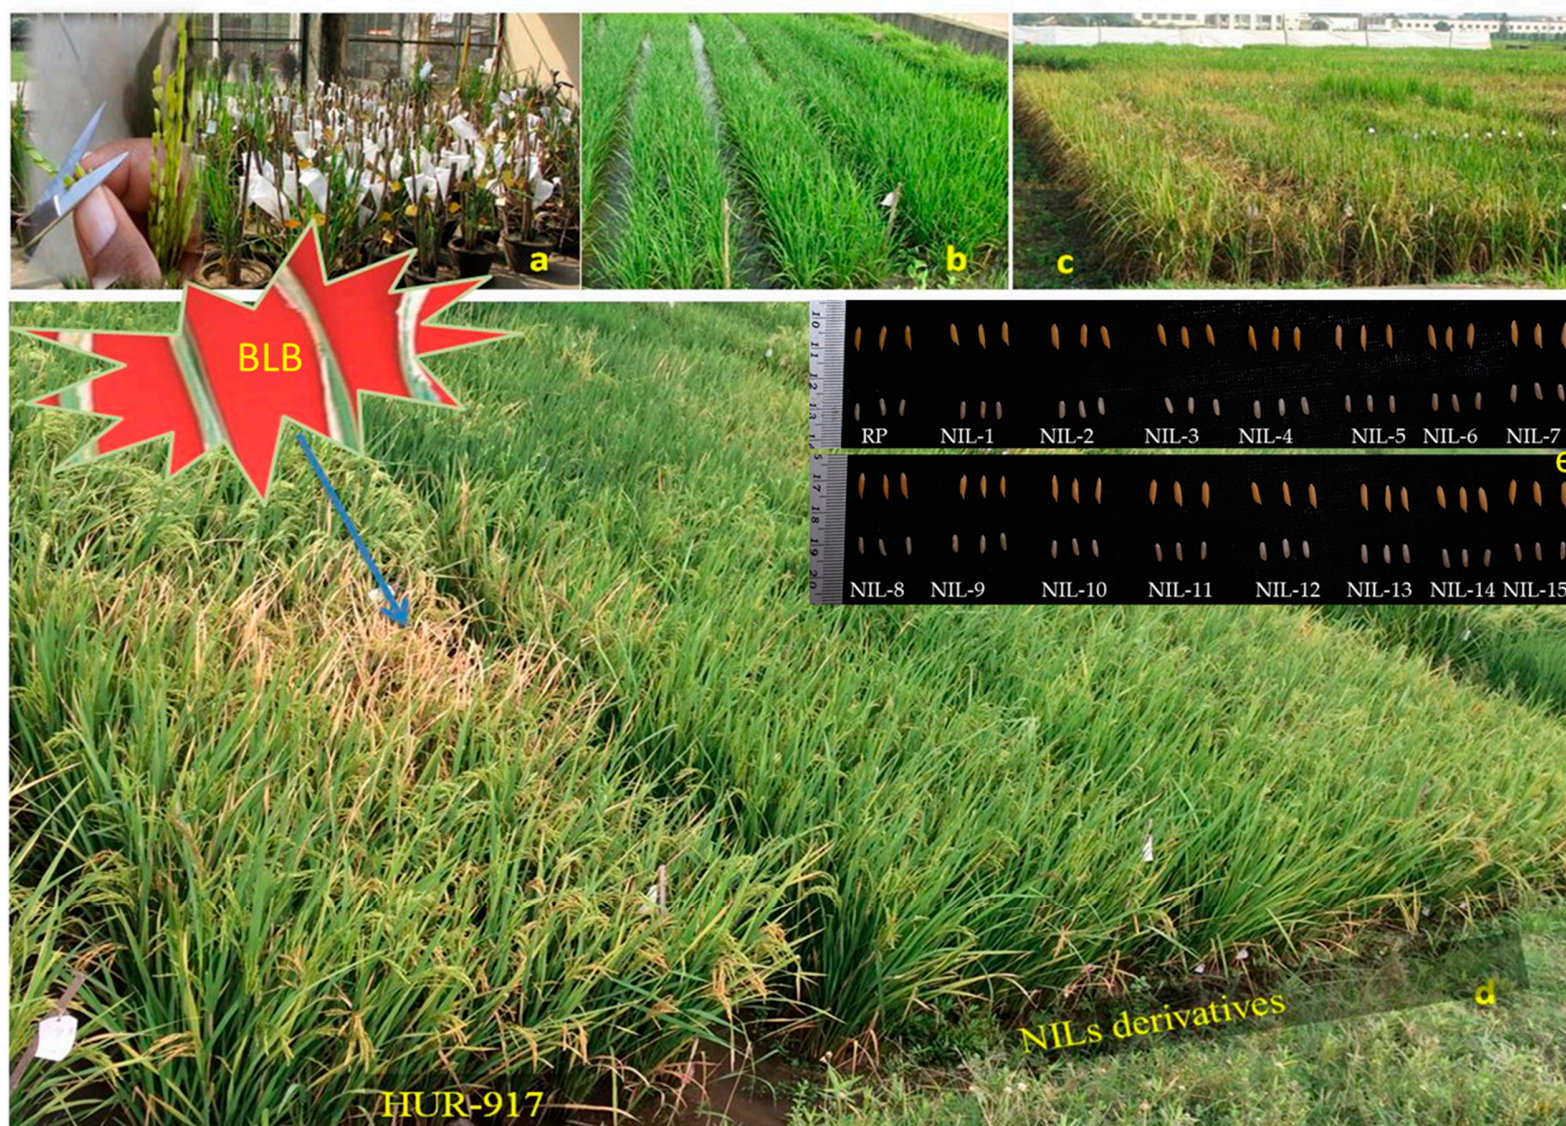

Supplementary Figure S6. Field view parents and NILs of HUR 917/IRBB66. (a) Crosses generation. (b) Preliminary evaluation. (c) Morphological variation in NILs. (d) Field view under natural condition. (e) Grain size of parents and NILs.
